# Supplementary material
Source: Research Square preprint supplement (doi:10.21203/rs.3.rs-8416228/v1)
Supplement: Supplementary file 1 [file 6439f7ffc7c6efc3fc14cf11.docx]

**Appendices**

Table X：Stop if predefined adverse event thresholds are met:

| Safety Endpoint | Definition | Definition | Threshold | Rationale |
| --- | --- | --- | --- | --- |
| Severe Hypotension | MAP＜65mmHg or <20% of baseline requiring vasopressors | 2.4% | RD≥10% | Literature reports an incidence of hypotension of 2.4% with etomidate in elderly patients[15], An increase >10% is deemed a clinically unacceptable risk by the hospital's Anesthesia Quality Committee. |
| Significant Respiratory Depression | SpO2 <93% for 30s, or RR <8 breaths/min, or requiring assisted ventilation/airway intervention | 7.8% | RR≥2.0 | Literature reports a 7.8% risk of respiratory depression with etomidate in painless GI endoscopy [16], RR ≥2.0 is a signal of regulatory concern, meeting FDA adverse event alert criteria. |
| Severe PONV | PONV causing delayed discharge or requiring ≥2 rescue treatments | 13.5% | RD≥20% | Literature reports a 13.5% risk of nausea and vomiting with etomidate in painless GI endoscopy[16], An increase ≥20% in severe PONV rate in outpatient surgery can lead to discharge delay and decreased patient satisfaction (Based on hospital's Ambulatory Surgery Center criteria). |
| Drug-Related Serious Adverse Event | Resulting in death/ hospitalization/ permanent disability | / | Review if ≥1 case occurs | Referring to the ICH E2A guideline principles for rapid reporting of Suspected Unexpected Serious Adverse Reactions (SUSARs). |

Table Y: Process schedule

| Phase | Timepoint | Key Steps |
| --- | --- | --- |
| Protocol Registration | Before trial initiation | Register the protocol on ClinicalTrials.gov |
| Interim Data Lock | After 126 cases (63/group) complete follow-up | IDMC initiates analysis |
| IDMC Decision Meeting | Within 2 weeks after data lock | Assess recommendation for termination/continuation |
| Result Notification | Within 24h after meeting | Inform the PI whether the primary endpoint is met and whether there are noteworthy signals regarding key safety endpoints (only indicating either no significant new major safety concerns or the need to pay attention to a specific type of adverse event). The PI must immediately review all occurred and ongoing reports of such events, assess their severity, causality, and whether they constitute a safety risk, report to the ethics committee if necessary, and enhance monitoring for such events. |
